# Supplementary material for: Homozygous Smpd1 deficiency aggravates brain ischemia/ reperfusion injury by mechanisms involving polymorphonuclear neutrophils, whereas heterozygous Smpd1 deficiency protects against mild focal cerebral ischemia
Source: Springer Nature journal article supplement (doi:10.1007/s00395-020-00823-x), 2020-10-14
Supplement: MOESM2 [file 18483650]

Homozygous *Smpd1* deficiency aggravates brain ischemia/ reperfusion injury by mechanisms involving polymorphonuclear neutrophils, whereas heterozygous *Smpd1* deficiency protects against mild focal cerebral ischemia

Basic research in Cardiology

Nina Hagemann, Ayan Mohamud Yusuf, Carlotta Martiny, Xiaoni Zhang, Christoph Kleinschnitz, Matthias Gunzer,

Richard Kolesnick, Erich Gulbins, Dirk M. Hermann

E-Mail: dirk.hermann@uk-essen.de

## Supplementary Figure 2

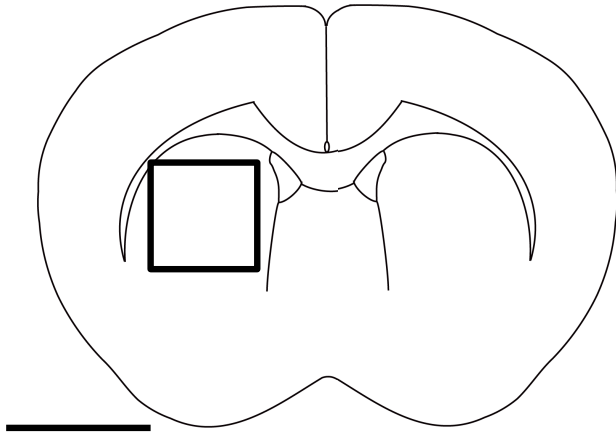

**Supplementary Figure 2. Schematic drawing exhibiting brain areas, in which TUNEL stainings and immunohistochemical stainings were analyzed.** Note the ROI measuring 1500 x 1500  $\mu\text{m}$  in the dorsolateral striatum, in which cell countings, area analyses and optical density measurements were performed. Scale bar, 2 mm.
